# Supplementary material for: Spatially Explicit Estimates of Prey Consumption Reveal a New Krill Predator in the Southern Ocean
Source: PubMed Central journal article supplement (PMC3905967; doi:10.1371/journal.pone.0086452), 2014-01-24
Supplement: pone.0086452.s001.pdf [file pone.0086452.s001.pdf]

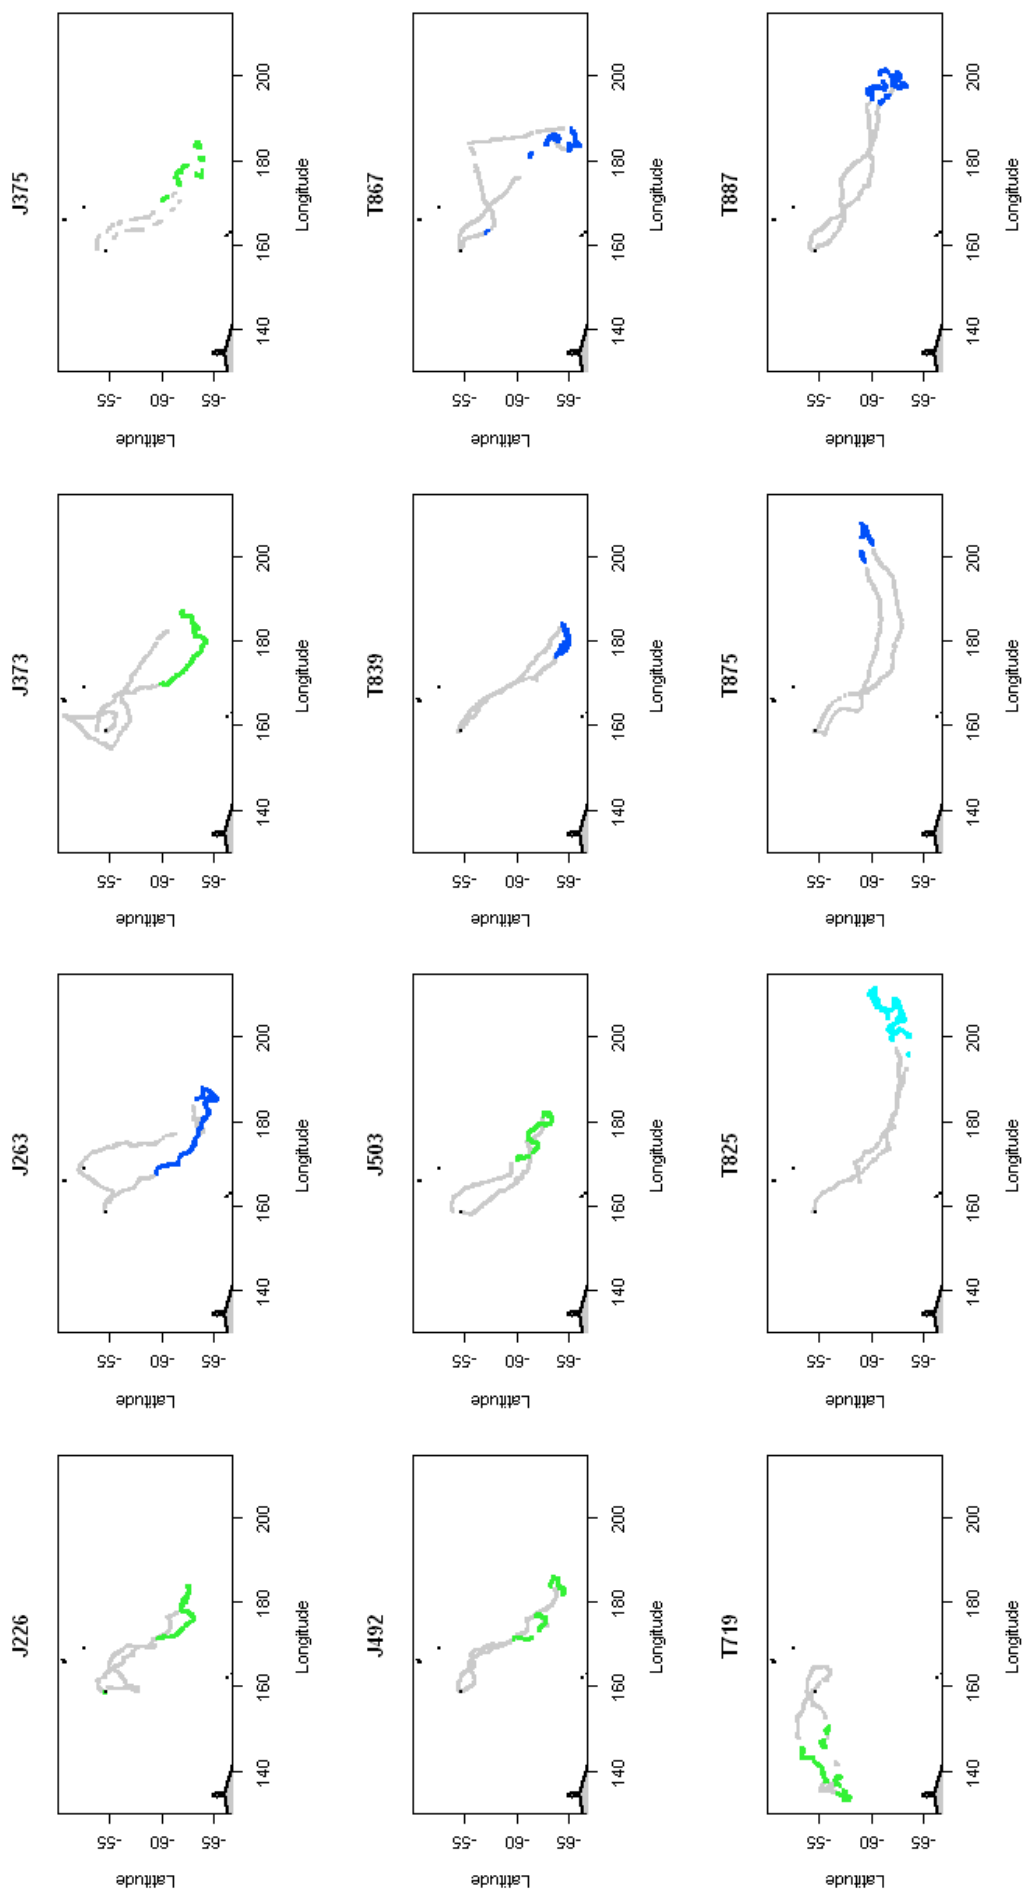

**Figure S1. Tracks overlaid with state estimates from the two-state first-difference correlated random walk switching (DCRWS) model.** Tracks of 12 weaned southern elephant seals during their first foraging migration from Macquarie Island, colour coded by state estimates. Grey: transit locations; light blue, blue and green: Area Restricted Search (ARS) locations for S of SACCF-S, ACC to PF-S and PF zones, respectively.
