# Supplementary material for: Spatially Explicit Estimates of Prey Consumption Reveal a New Krill Predator in the Southern Ocean
Source: PubMed Central journal article supplement (PMC3905967; doi:10.1371/journal.pone.0086452), 2014-01-24
Supplement: pone.0086452.s002.pdf [file pone.0086452.s002.pdf]

**Table S1.** Stable carbon ( $\delta^{13}\text{C}$ ) and nitrogen ( $\delta^{15}\text{N}$ ) values of various marine organisms from the Southern Ocean.

| Species                                          | Location                              | Tissue            | n  | $\delta^{13}\text{C}$ (‰) | $\delta^{15}\text{N}$ (‰) | Source                |
|--------------------------------------------------|---------------------------------------|-------------------|----|---------------------------|---------------------------|-----------------------|
| <b>Mid latitude waters (&lt;55°S)</b>            |                                       |                   |    |                           |                           |                       |
| Euphausiids                                      |                                       |                   |    |                           |                           |                       |
| <i>Euphausia frigida</i>                         | Weddell Sea (49°S, 20°E)              | Whole individuals | 4  | -24.3 ± 0.9               | 4.9 ± 0.3                 | Schmidt et al. (2004) |
| Fish                                             |                                       |                   |    |                           |                           |                       |
| <i>Krefflichthys anderssoni</i>                  | Kerguelen (49°21'S, 70°18'E)          | White muscle      | 12 | -22.3 ± 0.2               | 7.6 ± 0.2                 | Cherel et al. (2008)  |
| <i>Electrona antarctica</i>                      | Kerguelen (49°21'S, 70°18'E)          | White muscle      | 10 | -22.2 ± 0.9               | 8.0 ± 0.5                 | This study            |
| <i>Gymnoscopelus fraseri</i>                     | Kerguelen (49°21'S, 70°18'E)          | White muscle      | 7  | -22.5 ± 1.1               | 8.0 ± 0.5                 | This study            |
| <i>Gymnoscopelus nicholsi</i>                    | Kerguelen (49°21'S, 70°18'E)          | White muscle      | 10 | -22.7 ± 0.5               | 9.7 ± 0.7                 | This study            |
| <i>Protomyctophum tenisoni</i>                   | Kerguelen (49°21'S, 70°18'E)          | White muscle      | 5  | -22.1 ± 1.0               | 6.4 ± 0.3                 | This study            |
| <i>Gymnoscopelus piabilis</i>                    | Kerguelen (49°21'S, 70°18'E)          | White muscle      | 2  | -20.4 ± 0.3               | 7.8 ± 0.1                 | This study            |
| Squid                                            |                                       |                   |    |                           |                           |                       |
| <i>Histioteuthis eltaninae</i> (LRL: 2.2±0.2 mm) | Macquarie Island (54°30'S, 158°57'E)  | Beaks (corrected) | 26 | -21.2 ± 0.6               | 7.8 ± 1.9                 | Hughes (unpubl. data) |
| <i>Martialia hyadesi</i> (LRL: 6.5± 0.3 mm)      | Macquarie Island (54°30'S, 158°57'E)  | Beaks (corrected) | 17 | -21.6 ± 1.2               | 6.6 ± 1.5                 | Hughes (unpubl. data) |
| <b>High latitude waters (&gt;60°S)</b>           |                                       |                   |    |                           |                           |                       |
| Amphipod                                         |                                       |                   |    |                           |                           |                       |
| <i>Themisto gaudichaudii</i>                     | Dumont d'Urville Sea (65°30'S, 143°E) | Whole individuals | 7  | -26.0 ± 0.5               | 5.4 ± 0.4                 | This study            |
| Euphausiids                                      |                                       |                   |    |                           |                           |                       |
| <i>Euphausia superba</i>                         | Adélie Land (66°S, 136°E)             | Whole individuals | 12 | -25.8 ± 0.4               | 5.5 ± 0.4                 | Cherel (2008)         |
| <i>Euphausia triacantha</i>                      | Dumont d'Urville Sea (63°S, 140°E)    | Whole individuals | 10 | -23.6 ± 0.5               | 6.3 ± 0.6                 | This study            |
| Fish                                             |                                       |                   |    |                           |                           |                       |
| <i>Electrona antarctica</i>                      | Dumont d'Urville Sea (62°S, 140°E)    | White muscle      | 9  | -23.2 ± 0.4               | 8.3 ± 0.4                 | This study            |
| Squid                                            |                                       |                   |    |                           |                           |                       |
| <i>Psychrotheuthis glacialis</i>                 | Northern Ross Sea (65°S, 180°E)       | Mantle            | 20 | -25.3 ± 0.6               | 7.9 ± 0.6                 | Bury et al.(2008)     |
| <i>Galiteuthis glacialis</i>                     | Northern Ross Sea (65°S, 180°E)       | Mantle            | 3  | -24.7 ± 0.9               | 8.1 ± 0.4                 | Bury et al.(2008)     |
| <i>Kondakovia longimana</i>                      | Northern Ross Sea (65°S, 180°E)       | Mantle            | 20 | -25.1 ± 0.6               | 7.6 ± 0.6                 | Bury et al.(2008)     |
| <i>Bathyeuthis abyssicola</i>                    | Dumont d'Urville Sea (63°S, 140°E)    | Mantle            | 2  | -24.2 ± 0.3               | 8.0 ± 0.3                 | This study            |
| <i>Psychrotheuthis glacialis</i>                 | Dumont d'Urville Sea (65°30'S, 140°E) | Mantle            | 3  | -25.9 ± 0.2               | 10.0 ± 0.5                | This study            |

Beaks (corrected) = Squid beak isotopic values presented are corrected for reduced  $\delta^{15}\text{N}$  enrichment due to chitin. See Materials and Methods for details.  
 LRL = Lower Rostral Length of squid beaks
